# Supplementary material
Source: Springer Nature journal article supplement (https://www.springermedizin.de/resource/supplementary/12875_2013_1011_MOESM3_ESM.pdf/9435924)
Supplement: MOESM3 [file 9435924]

Percentage of adult population screened

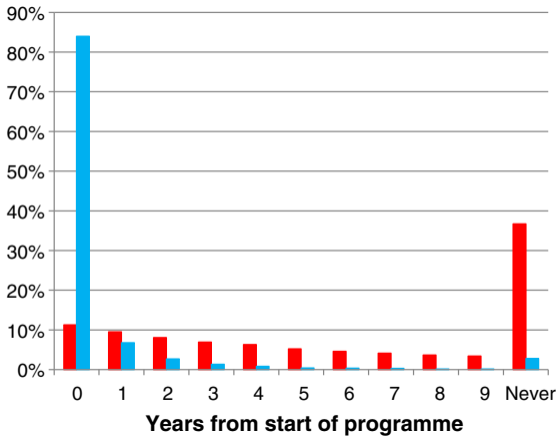

Next Registration

Next Consultation

Years from start of programme
